# Supplementary material for: Intramedullary Spinal Cord Tumors: Whole-Genome Sequencing to Assist Management and Prognosis
Source: MDPI journal article supplement (doi:10.3390/cancers16020404), 2024-01-18
Supplement: s1 [file s1]

# Supplementary Materials: Intramedullary Spinal Cord Tumors: Whole Genome Sequencing to Assist Management and Prognosis

Miguel Mayol del Valle <sup>1,\*</sup>, Bryan Morales <sup>2</sup>, Brandon Philbrick <sup>3</sup>, Segun Adeagbo <sup>3</sup>, Subir Goyal <sup>4</sup>, Sarah Newman <sup>1</sup>, Natasha L. Frontera <sup>5</sup>, Edjah Nduom <sup>1</sup>, Jeffrey Olson <sup>1</sup>, Stewart Neill <sup>2</sup> and Kimberly Hoang <sup>1</sup>

<sup>1</sup> Emory University Hospital, Department of Neurosurgery, 1365 Clifton Road NE, Suite B6200, Atlanta, GA 30322 USA

<sup>2</sup> Emory University Hospital, Department of Neuropathology, 1364 Clifton Road, NE Room H-184, Atlanta, GA 30322 USA

<sup>3</sup> Emory University School of Medicine, 100 Woodruff Circle, Atlanta, GA 30322 USA

<sup>4</sup> Biostatistics Shared Resource Department, Winship Cancer Institute of Emory University, 1365-C Clifton Road, NE, Atlanta, GA 30322 USA

<sup>5</sup> University of Puerto Rico Medical Sciences Campus, School of Medicine, PO Box 365067, San Juan, PR 00936-5067

\* Correspondence: mmayold@emory.edu

Table S1. (Patients with genetic testing).

| Age | Sex    | BMI  | Comorb       | Location    | Resect % | PO KPS | Hosp (days) | Diagnosis                         | Important Mutations                      | Gain | Loss | LOH | Total | Radiation (Dose)           | Chemo   | Progre        | Follow-up (Days) |
|-----|--------|------|--------------|-------------|----------|--------|-------------|-----------------------------------|------------------------------------------|------|------|-----|-------|----------------------------|---------|---------------|------------------|
| 68  | Female | 21.9 | HTN          | Thoracic    | 100%     | 60     | 9           | LGA (WHO II)                      | IDH WT                                   | n/a  | n/a  | n/a | n/a   |                            |         |               | 8                |
| 70  | Female | 26.9 | DM           | Cervical    | 78-99%   | 40     | 16          | Ependymoma (WHO II)               | IDH WT                                   | n/a  | n/a  | n/a | n/a   |                            |         | YES-Surgery   | 754              |
| 38  | Male   | 18   |              | Thoracic    | Biopsy   | 50     | 8           | LGA (WHO II)                      | IDH WT, BRAFV600E                        | n/a  | n/a  | n/a | n/a   | Fractionated (50.4)        |         |               | 303              |
| 37  | Female | 22.3 |              | Cervical    | 100%     | 90     | 5           | Ependymoma (WHO II)               | IDH WT                                   | n/a  | n/a  | n/a | n/a   |                            |         |               | 36               |
| 71  | Female | 44.4 | HTN, CAD, DM | Thoracic    | 0%       | 60     | 8           | Astrocytoma (WHO III)             | IDH WT, P53 overexp                      | n/a  | n/a  | n/a | n/a   | Fractionated (50.4)        |         | YES-Radiation | 223              |
| 47  | Female | 38.1 |              | Cervical    | 100%     | 80     | 4           | LGA (WHO II)                      |                                          | n/a  | n/a  | n/a | n/a   |                            |         |               | 359              |
| 61  | Female | 22.5 |              | Cervicothor | 78-99%   | 40     | 13          | Ependymoma (WHO II)               |                                          | 0    | 2    | 0   | 2     |                            |         |               | 107              |
| 55  | Female | 28.3 |              | Cervical    | 78-99%   | 60     | 7           | Ependymoma (WHO II)               |                                          | 0    | 2    | 0   | 2     | Fractionated Proton (50.4) |         |               | 610              |
| 54  | Male   | 28.3 |              | Cervical    | Biopsy   | 80     | 3           | Ependymoma (WHO II)               | IDH WT                                   | 5    | 3    | 0   | 8     | Fractionated Proton (52.2) |         |               | 467              |
| 61  | Male   | 28.2 | HTN, MI      | Cervical    | 78-99%   | 60     | 21          | Ependymoma (WHO II)               |                                          | 2    | 6    | 1   | 9     |                            |         | Yes-Death     | 43               |
| 29  | Male   | 34.3 | HTN, DM      | Thoracic    | 78-99%   | 80     | 4           | Glioblastoma (WHO IV))            | IDH WT, ATRX Del, MGMT Meth, KRAS pos    | 6    | 6    | 1   | 13    | Fractionated (48.6)        | Temodar | YES-Chemo/Rad | 143              |
| 68  | Female | 24.9 |              | Lumbar      | 100%     | 80     | 5           | Myxopapillary Ependymoma (WHO II) |                                          | 6    | 10   | 0   | 16    |                            |         |               | 536              |
| 41  | Female | 38.3 | HTN, CAD     | Cervical    | <50%     | 70     | 11          | Glioblastoma (WHO IV))            | IDH WT, ATRX Del, MGMT Meth, P53 overexp | 0    | 25   | 5   | 30    |                            |         | Yes-Hospice   | 39               |
| 54  | Male   | 23.5 |              | Cervical    | 100%     | 90     | 6           | Ependymoma (WHO II)               |                                          | 37   | 0    | 0   | 37    |                            |         |               | 161              |
